# Supplementary material for: Targeting Serotonin With Common Antidepressants Induces Rapid Recovery From Cytopenia
Source: PubMed Central journal article supplement (PMC9492259; doi:10.1093/stcltm/szac055), 2022-08-10
Supplement: szac055_suppl_supplementary_figure.pdf [file szac055_suppl_supplementary_figure.pdf]

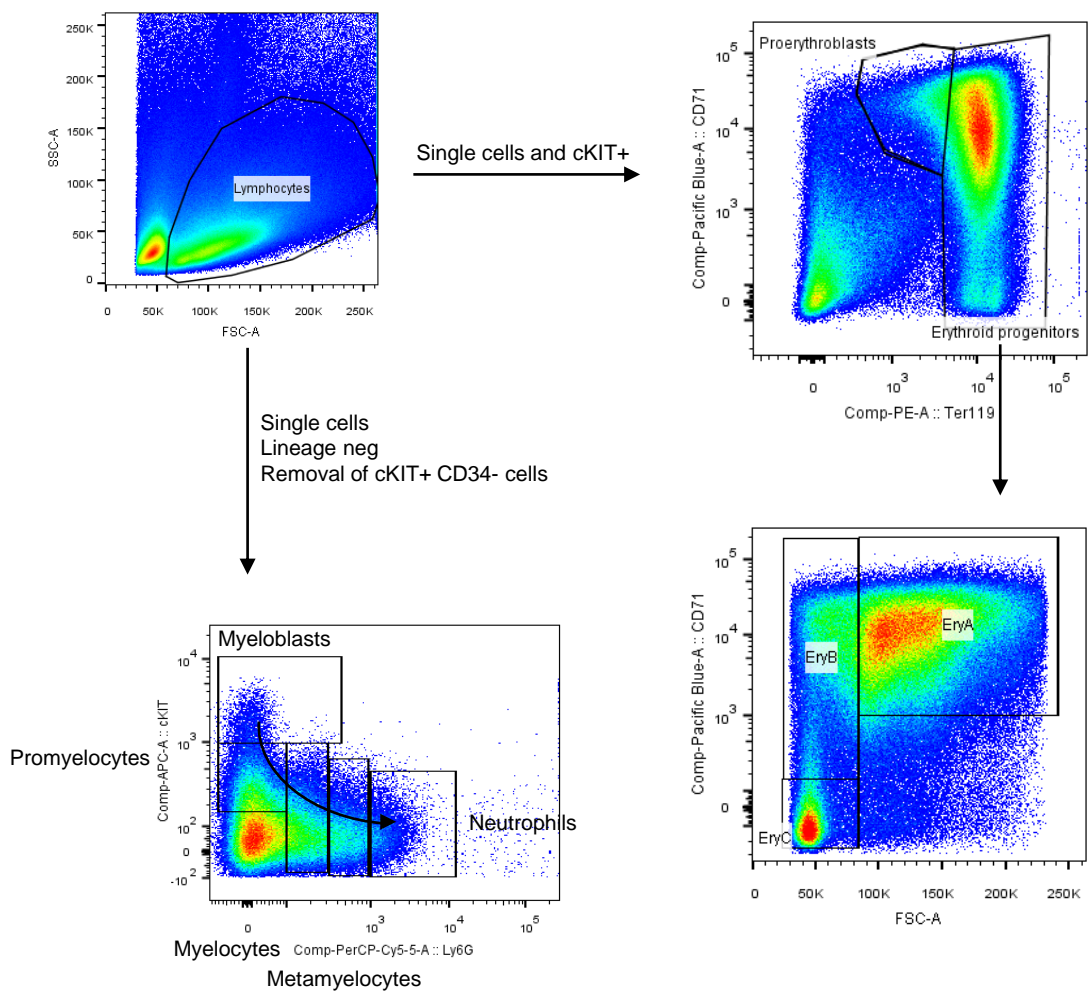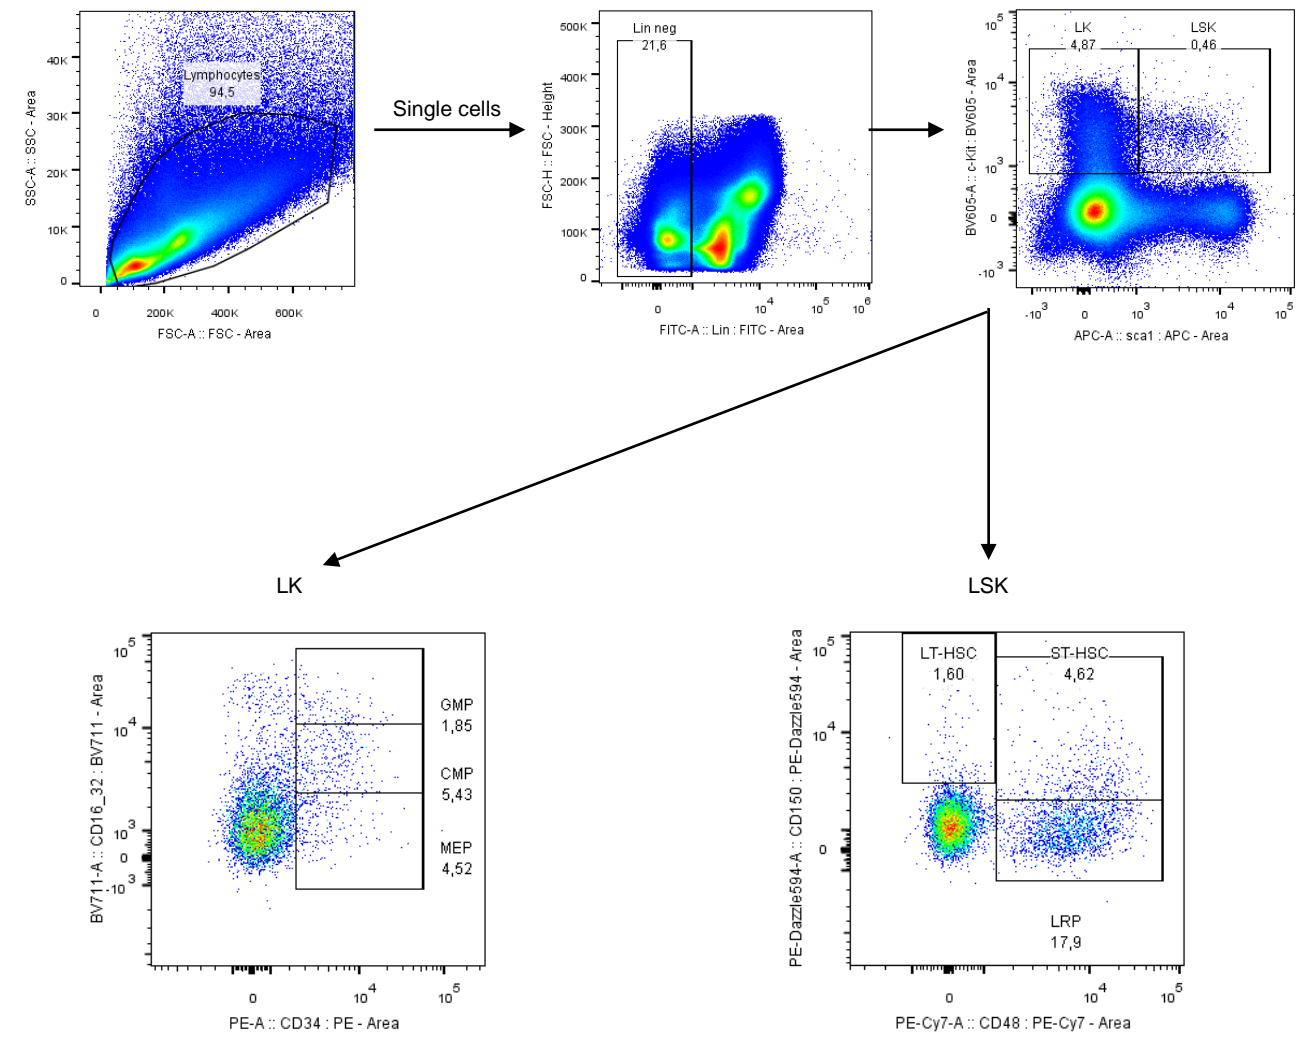

**A**

**B**

**Supplementary Figure 1. Flow cytometry gating strategies.**

**Supplemental Table 1. Mean values 17 days after irradiation in pooled mice experiments**

| Treatment          | Hemoglobin, g/dL | Platelets, $10^3/\text{mm}^3$ | Neutrophils, $10^3/\text{mm}^3$ |
|--------------------|------------------|-------------------------------|---------------------------------|
| Control            | 4                | 84                            | 0.253                           |
| Fluoxetine         | 7.3              | 140                           | 0.602                           |
| G-CSF              | 8                | 263                           | 0.813                           |
| G-CSF + fluoxetine | 10.5             | 308                           | 1.220                           |

*G-CSF, granulocyte colony-stimulating factor.*
